# Supplementary material for: Oxygen-vacancy-rich Fe3O4/carbon nanosheets enabling high-attenuation and broadband microwave absorption through the integration of interfacial polarization and charge-separation polarization
Source: Royal Society of Chemistry journal article supplement (doi:10.1039/d2ta00080f), 2022-01-01
Supplement: d2ta00080f1.pdf [file d2ta00080f1.pdf]

## Supporting Information

# Oxygen-Vacancy-Rich Fe<sub>3</sub>O<sub>4</sub>/Carbon Nanosheets Enabling High-Attenuation and Broadband Microwave Absorption through the Integration of Interfacial polarization and Charge-Separation polarization

*Zhe Su,<sup>a</sup> Wanyu Zhang,<sup>a</sup> Jiawei Lu,<sup>a</sup> Liying Tian,<sup>a</sup> Shan Yi,<sup>a</sup> Yayun Zhang,<sup>a</sup> Shenghu Zhou,<sup>a</sup> Bo Niu,<sup>\*a</sup> and Donghui Long<sup>\*a</sup>*

<sup>a</sup> Shanghai Key Laboratory of Multiphase Materials Chemical Engineering, East China University of Science and Technology, School of Chemical Engineering, Shanghai 200237, P. R. China.

\* Corresponding authors.

Tel: +86 21 64252263.

Fax: +86 21 64252263.

E-mail address:

niubo@ecust.edu.cn (Bo Niu)

longdh@mail.ecust.edu.cn (Donghui Long)

According to the transmission line theory, the values of RL are calculated via the following equations:<sup>1</sup>

$$R_L(dB) = 20 \log \left| \frac{Z_{in} - Z_0}{Z_{in} + Z_0} \right| \quad \text{Equation S1}$$

$$Z_{in} = Z_0 \sqrt{\frac{\mu_r}{\epsilon_r}} \tanh \left[ j \frac{2\pi}{c} \sqrt{\mu_r \epsilon_r} f d \right] \quad \text{Equation S2}$$

where  $Z_0$  is the impedance of free space,  $Z_{in}$  is the normalized input impedance of the absorber,  $\epsilon_r$  ( $\epsilon_r = \epsilon' - j\epsilon''$ ) is the relative complex permittivity of the absorber,  $\mu_r$  ( $\mu_r = \mu' - j\mu''$ ) is the relative complex permeability,  $f$  represents the electromagnetic wave frequency,  $c$  is the velocity of the EM wave in free space, and  $d$  expresses the thickness of the absorber, respectively.

Debye dipolar relaxation (Cole-Cole model), where the permittivity can be described as:<sup>2</sup>

$$\epsilon_r = \epsilon' - j\epsilon'' = \epsilon_\infty + \frac{\epsilon_s - \epsilon_\infty}{1 + j2\pi f\tau}$$

**Equation S3**

where  $\tau$ ,  $\epsilon_s$ ,  $\epsilon_\infty$ , and  $f$  stands for the polarization relaxation time, static permittivity constant, relative dielectric permittivity at the infinite frequency, and frequency, respectively. And then  $\epsilon'$  and  $\epsilon''$  can be deduced as follows:

$$\epsilon' = \epsilon_\infty + \frac{\epsilon_s - \epsilon_\infty}{1 + (2\pi f\tau)^2}$$

**Equation S4**

$$\epsilon'' = \epsilon_\infty + \frac{2\pi f\tau(\epsilon_s - \epsilon_\infty)}{1 + (2\pi f\tau)^2}$$

**Equation S5**

Based on above equations, the relationship between  $\epsilon'$  and  $\epsilon''$  can be written as:

$$\left(\epsilon' - \frac{\epsilon_s + \epsilon_\infty}{2}\right)^2 + (\epsilon'')^2 = \left(\frac{\epsilon_s - \epsilon_\infty}{2}\right)^2$$

**Equation S6**

The eddy current can be calculated by the following eddy equation:<sup>3</sup>

$$c_0 = \mu''(\mu')^{-2}(f)^{-1} = 2\pi\mu_0 d^2 \sigma / 3$$

**Equation S7**

where  $\mu_0$  and  $\sigma$  are the permeability of vacuum and the electric conductivity, respectively.

The attenuation constant  $\alpha$  determines the dissipation properties of the material. It can be evaluated through the following equation:<sup>2</sup>

$$\alpha = \frac{\sqrt{2\pi f}}{c} \times \sqrt{(\mu''\varepsilon'' - \mu'\varepsilon') + \sqrt{(\mu''\varepsilon'' - \mu'\varepsilon')^2 + (\mu'\varepsilon'' + \mu''\varepsilon')^2}}$$

**Equation S8**

Delta values ( $\Delta$ ) therein can be deduced by the following equations,<sup>2</sup>

$$|\Delta| = |\sinh^2(Kfd) - M|$$

**Equation S9**

where  $K$  and  $M$  can be determined by the relative complex permittivity and permeability via following equation,

$$K = \frac{4\pi\sqrt{\mu'\varepsilon'} \cdot \sin\left(\frac{\delta_e + \delta_m}{2}\right)}{c \cdot \cos\delta_e \cdot \cos\delta_m}$$

**Equation**

**S10**

$$M = \frac{4\mu'\varepsilon'\cos\delta_e\cos\delta_m}{(\mu'\cos\delta_e - \varepsilon'\cos\delta_m)^2 + \left[\tan\left(\frac{\delta_m}{2} - \frac{\delta_e}{2}\right)\right]^2(\mu'\cos\delta_e + \varepsilon'\cos\delta_m)^2}$$

**Equation S11**

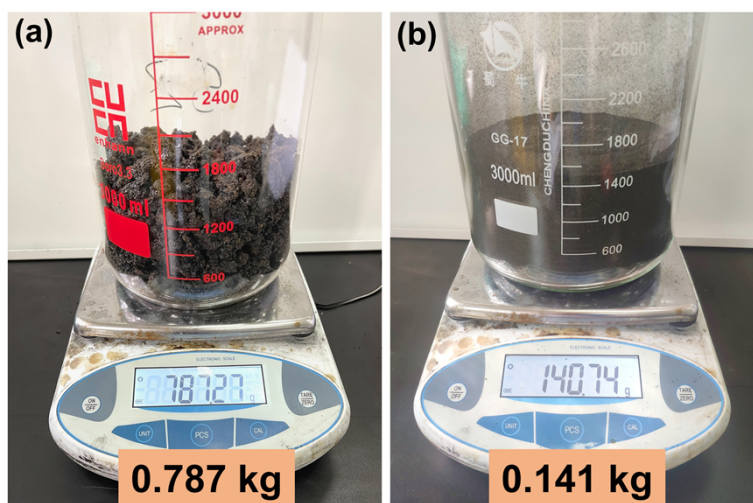

**Figure S1.** The digital photographs of a) mass-produced GlcA-Fe<sup>3+</sup> precursors with a weight of 0.787 kg, b) 0.141 kg Fe<sub>3</sub>O<sub>4</sub>/C composites which are manufactured by annealing 0.413 kg GlcA-Fe<sup>3+</sup> precursors in a big furnace at 700 °C for one hour.

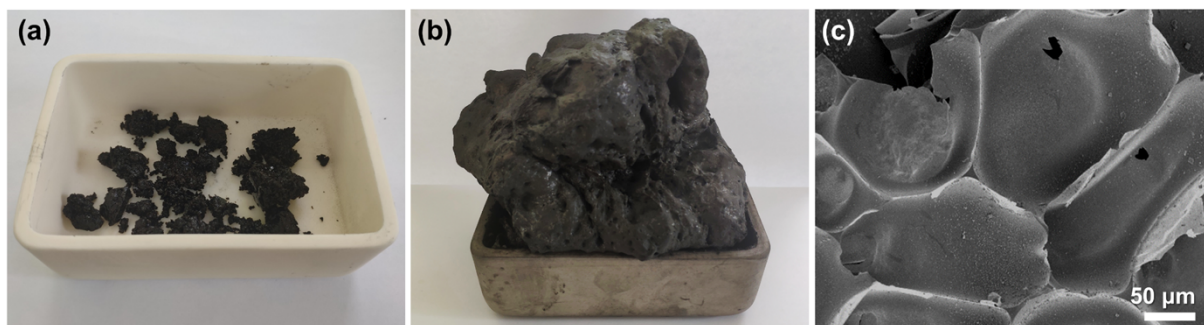

**Figure S2.** The digital photographs of a) GlcA-Fe<sup>3+</sup> precursor and b) Fe<sub>3</sub>O<sub>4</sub>/C products. c) Low-resolution SEM image of honeycomb structured Fe<sub>3</sub>O<sub>4</sub>/C bulks.

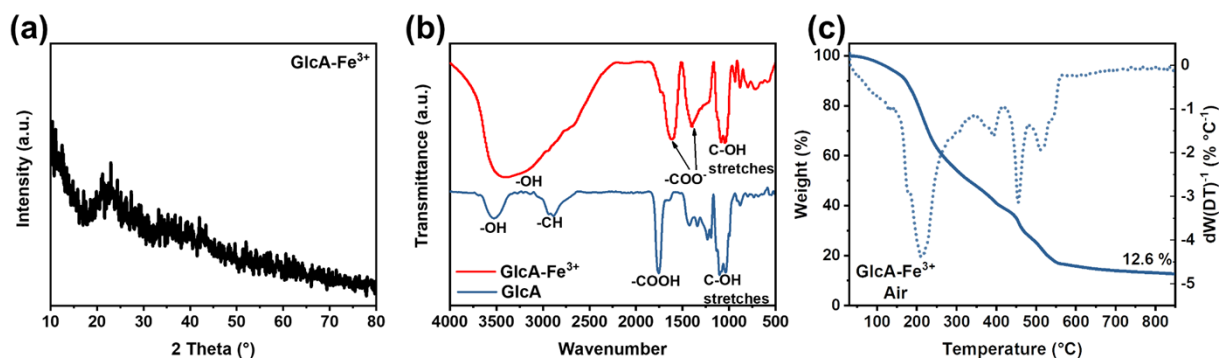

**Figure S3.** a) X-ray diffraction (XRD) pattern of  $\text{GlcA-Fe}^{3+}$  precursor. b) FT-IR spectra comparison between the  $\text{GlcA-Fe}^{3+}$  precursor and gluconic acid (GlcA). c) Thermogravimetric analysis (TGA) curve and derivative thermogravimetric (DTG) curve of  $\text{GlcA-Fe}^{3+}$  precursor under air atmosphere.

The FT-IR spectra of  $\text{GlcA-Fe}^{3+}$  shows that two intensive bands at  $1585\text{ cm}^{-1}$  and  $1385\text{ cm}^{-1}$  are the results of valence asymmetric and symmetric stretching vibrations of a carbonyl group ( $\text{C=O}$ ) of carboxylate anion ( $-\text{COO}^-$ ) (**Figure S3b**).<sup>4</sup> As a contrast, an isolated band located at  $1755\text{ cm}^{-1}$  in the spectrum of gluconic acid (GlcA) is associated with the carbonyl group of carboxylic acid ( $-\text{COOH}$ ).<sup>5</sup> Therefore, the difference in valence vibrations of carboxyl group indicates a coordination of gluconate anion and iron (III) ion in  $\text{GlcA-Fe}^{3+}$ .

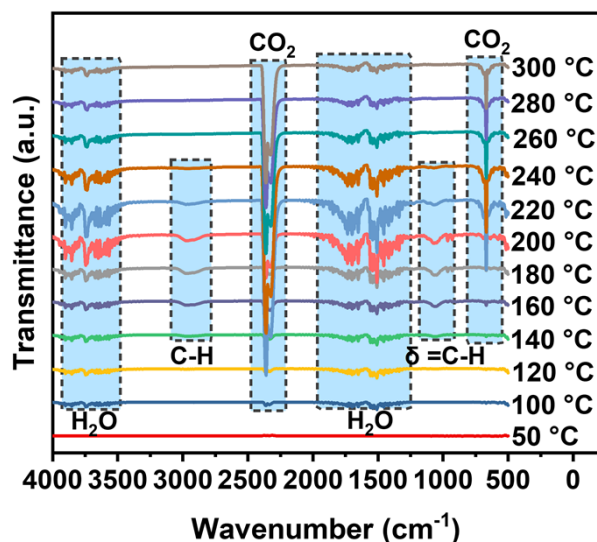

**Figure S4.** In-situ FT-IR spectra of pyrolysis gas evolved during the pyrolysis process of the GlcA-Fe<sup>3+</sup> precursor.

Typical transmission bands for CO<sub>2</sub> are located at 2300 cm<sup>-1</sup> corresponding to the asymmetric stretching mode, and bending vibration bands are located at 670 cm<sup>-1</sup>. For gaseous water, two broad bands at around 1600 cm<sup>-1</sup> (bending mode of H<sub>2</sub>O) and 3600 cm<sup>-1</sup> (symmetric and antisymmetric stretching mode of H<sub>2</sub>O) are visible.<sup>6</sup>



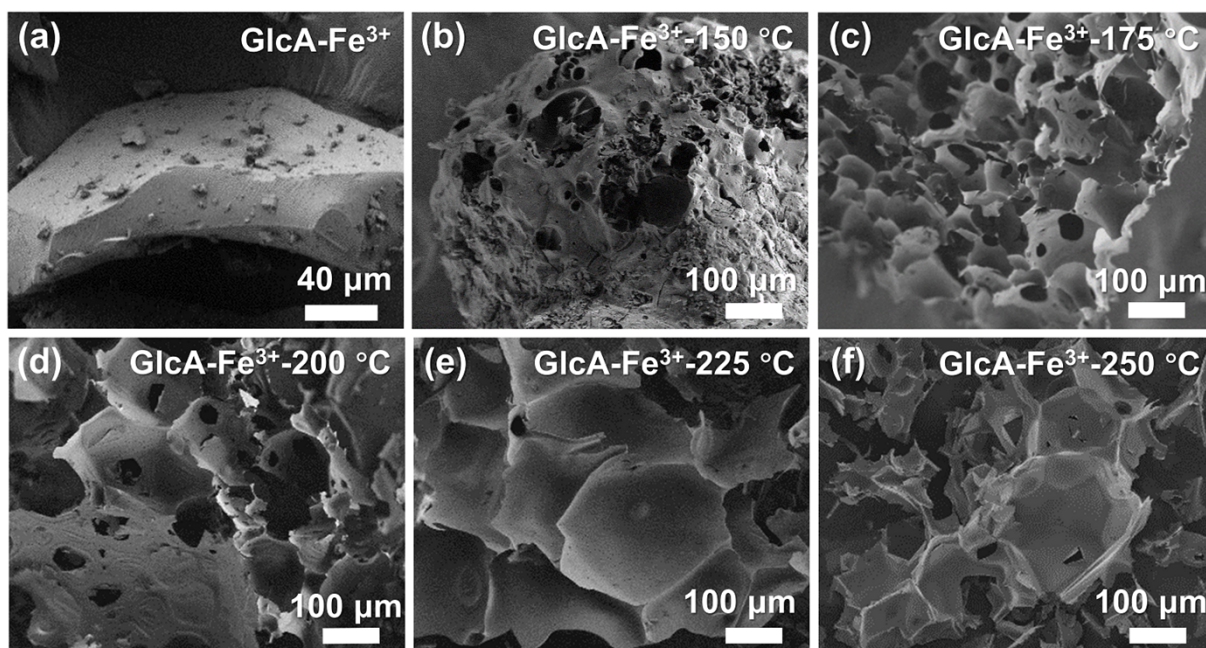

**Figure S5.** SEM images of GlcA-Fe<sup>3+</sup> pyrolyzed at different temperatures: a) room temperature, b) 150 °C, c) 175 °C, d) 200 °C, e) 225 °C, and f) 250 °C.

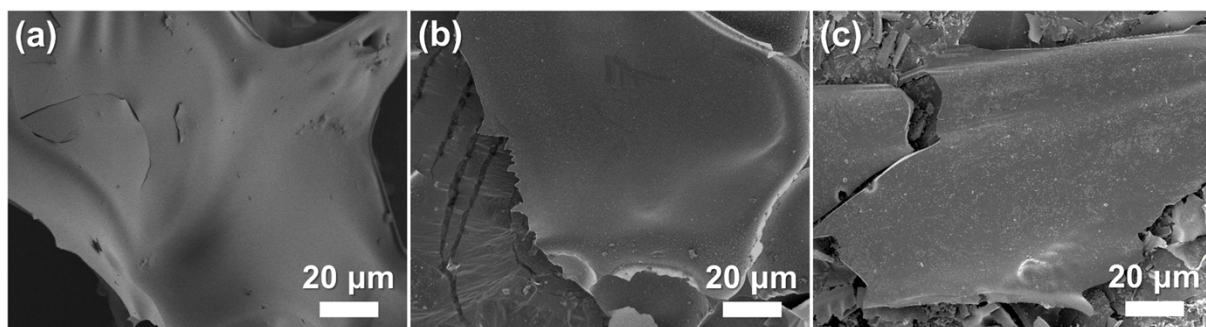

**Figure S6.** Low-resolution SEM images of a)  $\text{Fe}_3\text{O}_4/\text{C}$ -600, b)  $\text{Fe}_3\text{O}_4/\text{C}$ -700, and c)  $\text{Fe}_3\text{O}_4/\text{C}$ -800, respectively.

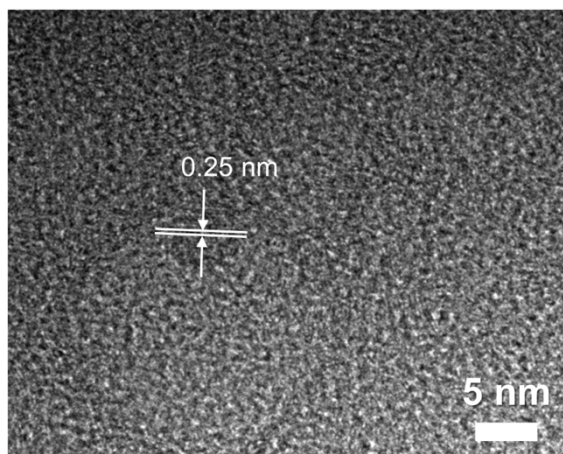

**Figure S7.** High-resolution TEM image of yolk-shell structure in the  $\text{Fe}_3\text{O}_4/\text{C-700}$ .

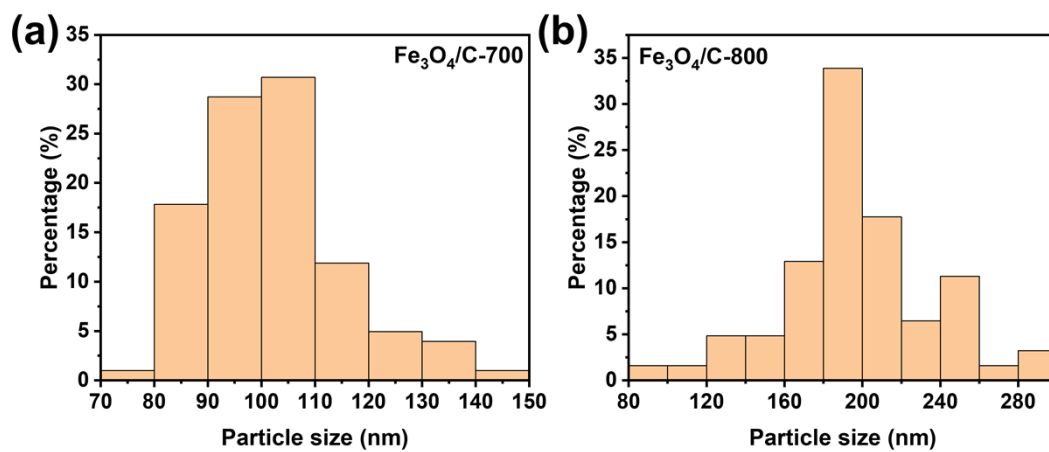

**Figure S8.** Size distributions of  $\text{Fe}_3\text{O}_4$  nanocrystals for a)  $\text{Fe}_3\text{O}_4/\text{C-700}$  and b)  $\text{Fe}_3\text{O}_4/\text{C-800}$ .

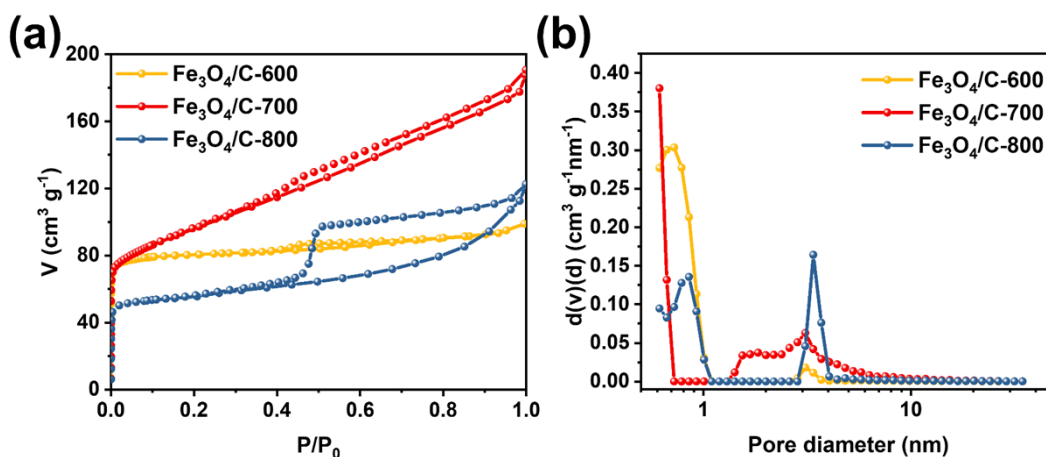

**Figure S9.** a) N<sub>2</sub> adsorption/desorption isotherms, and b) corresponding QSDFT pore-size distribution curves of Fe<sub>3</sub>O<sub>4</sub>/C at 600 °C, 700 °C, and 800 °C, respectively.

The specific surface area and pore structure characteristics of these Fe<sub>3</sub>O<sub>4</sub>/C composites are measured by N<sub>2</sub> adsorption/desorption isotherms (**Figure S9**). Due to the emergence of shell structures and the aggregation of Fe<sub>3</sub>O<sub>4</sub> nanocrystals at 700 °C and 800 °C, much more mesopores and large pores will be produced. Thus, both Fe<sub>3</sub>O<sub>4</sub>/C-700 and Fe<sub>3</sub>O<sub>4</sub>/C-800 exhibit an enlarged hysteresis loop in a higher relative pressure range ( $P/P_0$  of 0.4–0.99), comparing with Fe<sub>3</sub>O<sub>4</sub>/C-600. As displayed in **Figure S9b**, the corresponding pore size distributions are deduced by the QSDFT method, which validate that the Fe<sub>3</sub>O<sub>4</sub>/C-700 and Fe<sub>3</sub>O<sub>4</sub>/C-800 have abundant mesopores. More detailed pore parameters are listed in **Table S1**.

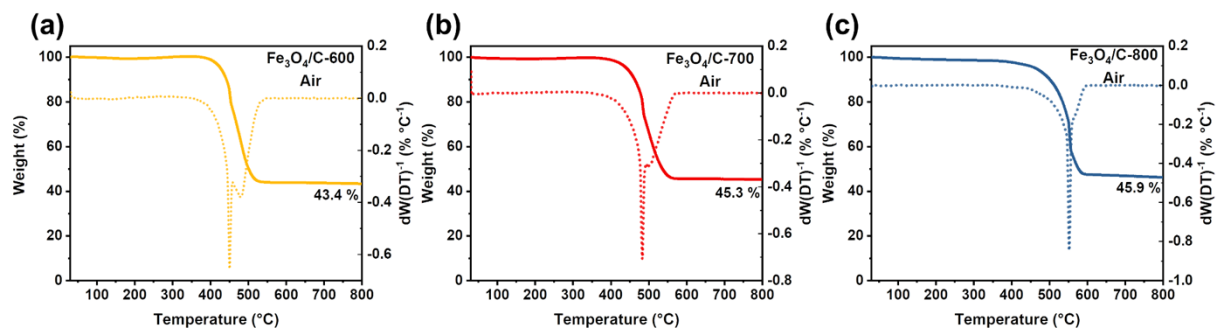

**Figure S10.** Thermogravimetric analysis (TGA) curve and derivative thermogravimetric (DTG) curve of a) Fe<sub>3</sub>O<sub>4</sub>/C-600, b) Fe<sub>3</sub>O<sub>4</sub>/C-700, and c) Fe<sub>3</sub>O<sub>4</sub>/C-800 under air atmosphere, respectively.

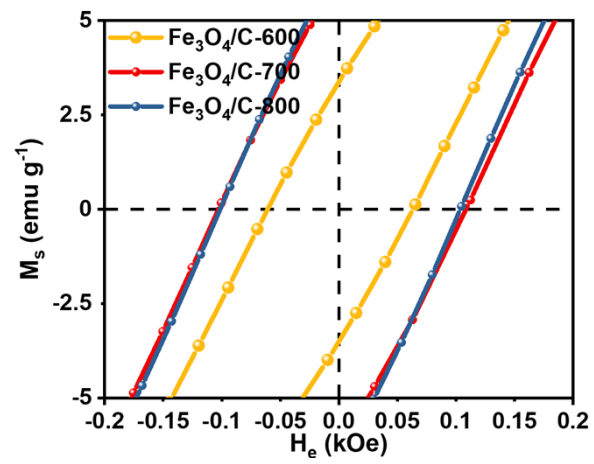

**Figure S11.** Magnified views of the hysteresis loop at low applied fields.

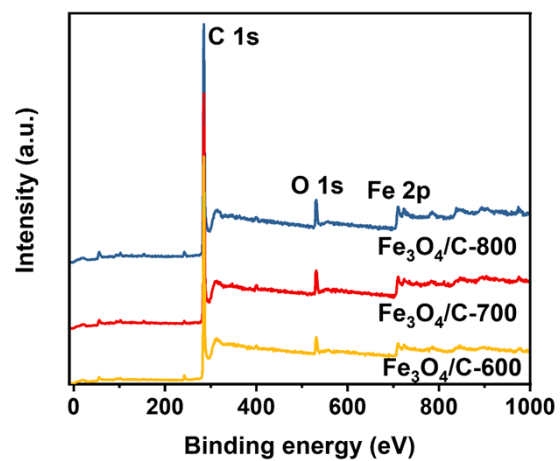

**Figure S12.** X-ray photoelectron spectroscopy (XPS) survey.



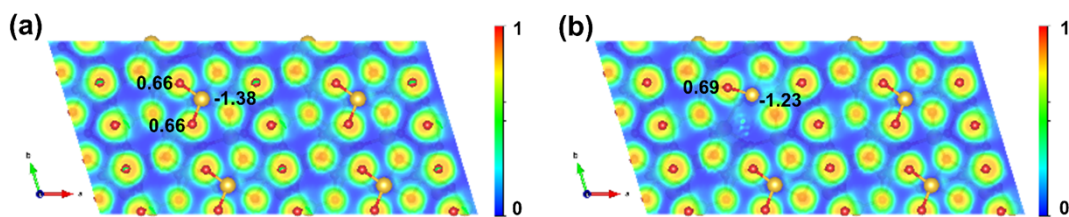

**Figure S13.** Calculated Bader charge: top view electron density differences of a) perfect  $\text{Fe}_3\text{O}_4$  (311) plane and b) oxygen-vacancy  $\text{Fe}_3\text{O}_4$  (311) plane.

The existence of oxygen vacancies in the  $\text{Fe}_3\text{O}_4$  crystal results in the decrease of the electron loss of Fe atom from 1.38 to 1.23. The result agrees well with the negative shift of the binding energy of Fe element presented in XPS of  $\text{Fe}_3\text{O}_4/\text{C-700}$  and  $\text{Fe}_3\text{O}_4/\text{C-800}$ .

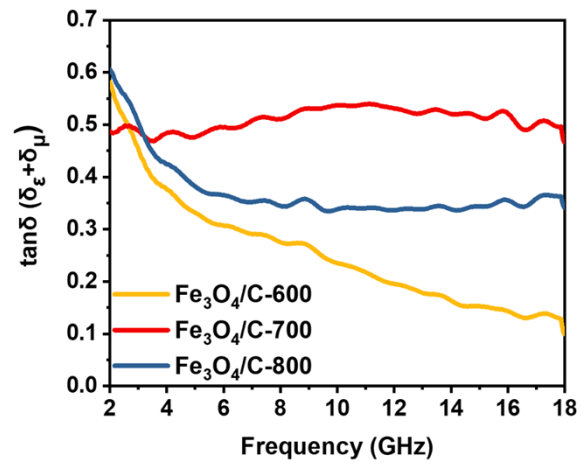

**Figure S14.** Loss factor ( $\tan\delta = \tan\delta_\epsilon + \tan\delta_\mu$ ) of Fe<sub>3</sub>O<sub>4</sub>/C-600, Fe<sub>3</sub>O<sub>4</sub>/C-700, and Fe<sub>3</sub>O<sub>4</sub>/C-800, respectively.

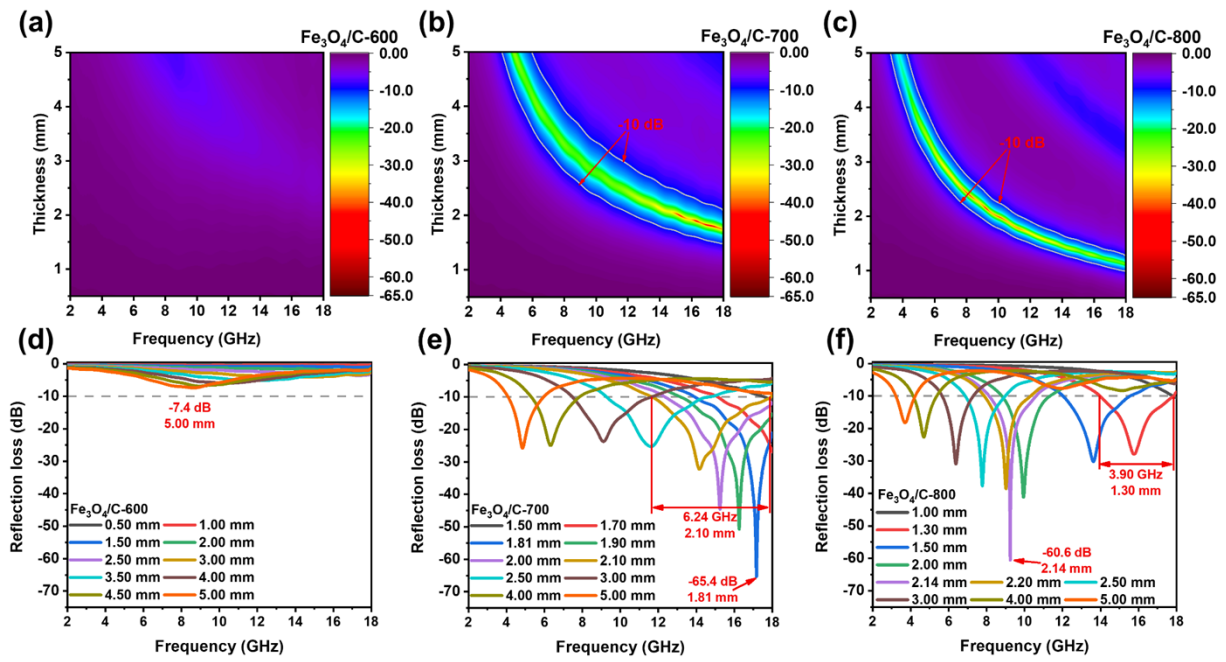

**Figure S15.** Reflection loss contour maps and corresponding curves of a)  $\text{Fe}_3\text{O}_4/\text{C}$ -600, b)  $\text{Fe}_3\text{O}_4/\text{C}$ -700, and c)  $\text{Fe}_3\text{O}_4/\text{C}$ -800, respectively.

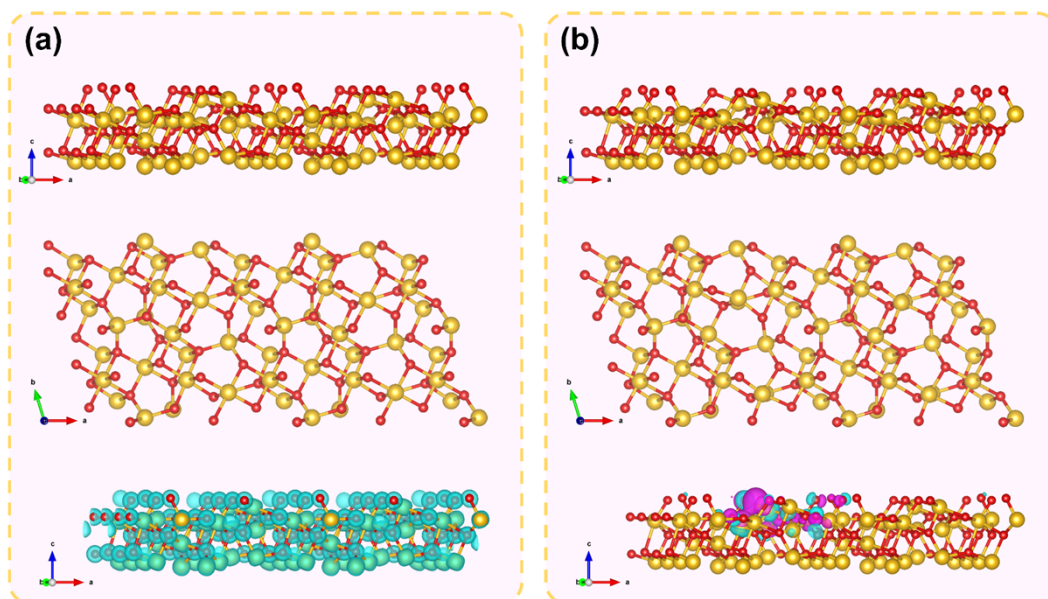

**Figure S16.** The side view (upper), top view (middle) and side view of charge distribution (bottom) of a) perfect  $\text{Fe}_3\text{O}_4$  and b) oxygen-vacancy  $\text{Fe}_3\text{O}_4$ .

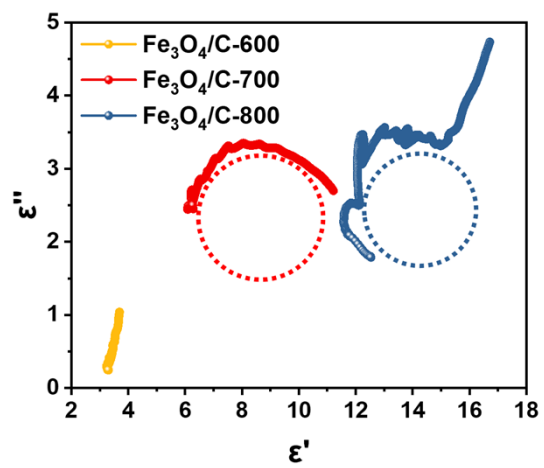

**Figure S17.** Cole-Cole plot of  $\text{Fe}_3\text{O}_4/\text{C-600}$ ,  $\text{Fe}_3\text{O}_4/\text{C-700}$ , and  $\text{Fe}_3\text{O}_4/\text{C-800}$ , respectively.

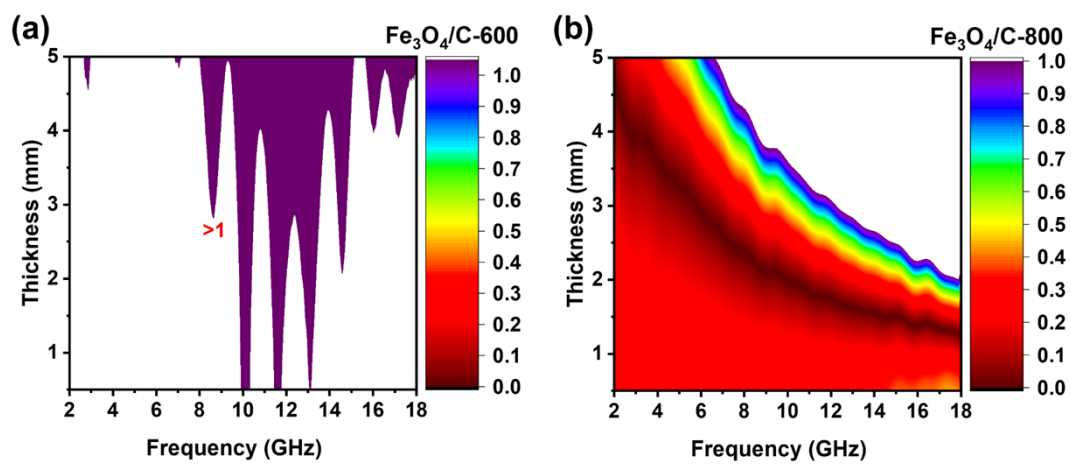

**Figure S18.** Calculated delta value maps of a)  $\text{Fe}_3\text{O}_4/\text{C-600}$  and b)  $\text{Fe}_3\text{O}_4/\text{C-800}$ .

**Table S1.** Detailed pore parameters of Fe<sub>3</sub>O<sub>4</sub>/C-600, Fe<sub>3</sub>O<sub>4</sub>/C-700 and Fe<sub>3</sub>O<sub>4</sub>/C-800, respectively.

| Sample                                | S <sub>BET</sub> (m <sup>2</sup> g <sup>-1</sup> ) | S <sub>Micro</sub> (m <sup>2</sup> g <sup>-1</sup> ) | V <sub>Total</sub> (cm <sup>3</sup> g <sup>-1</sup> ) | V <sub>Micro</sub> (cm <sup>3</sup> g <sup>-1</sup> ) |
|---------------------------------------|----------------------------------------------------|------------------------------------------------------|-------------------------------------------------------|-------------------------------------------------------|
| Fe <sub>3</sub> O <sub>4</sub> /C-600 | 296                                                | 272                                                  | 0.15                                                  | 0.11                                                  |
| Fe <sub>3</sub> O <sub>4</sub> /C-700 | 331                                                | 124                                                  | 0.30                                                  | 0.06                                                  |
| Fe <sub>3</sub> O <sub>4</sub> /C-800 | 179                                                | 113                                                  | 0.19                                                  | 0.06                                                  |

**Table S2.** Comparison of EM wave absorption properties among Fe<sub>3</sub>O<sub>4</sub>/C-700 composite and other absorbers in recent literature.

| Sample                                                           | Relection loss (dB) | Thickness (mm) | Effective absorption bandwidth (GHz) | References |
|------------------------------------------------------------------|---------------------|----------------|--------------------------------------|------------|
| Fe <sub>3</sub> O <sub>4</sub> /C-700                            | -65.4               | 1.81           | 6.24                                 | This work  |
| Ni/C                                                             | -57.25              | 1.8            | 5.1                                  | 7          |
| SCN-16                                                           | -54.5               | 2.2            | 6.88                                 | 8          |
| ZnCo <sub>2</sub> O <sub>4</sub>                                 | -36.33              | 3.4            | 5.11                                 | 9          |
| HBN-Co/C                                                         | -42.3               | 1.9            | 5.1                                  | 10         |
| HCP@PANI                                                         | -64                 | 2.5            | 5                                    | 11         |
| FeNR@rGO                                                         | -23.09              | 4              | 3.9                                  | 12         |
| BC/Fe <sub>3</sub> O <sub>4</sub> @C                             | -56.61              | 2.46           | 5.68                                 | 13         |
| Co <sub>3</sub> O <sub>4</sub> @NiCo <sub>2</sub> O <sub>4</sub> | -34.42              | 2.3            | 4.88                                 | 14         |
| Graphene@CuS                                                     | -54.5               | 2.5            | 4.5                                  | 15         |
| Co/C                                                             | -35.3               | 4              | 5.8                                  | 16         |
| NCO@CNTs                                                         | -45.1               | 2.5            | 2.7                                  | 17         |
| Fe <sub>3</sub> O <sub>4</sub> /CF                               | -48.2               | 1.9            | 5.1                                  | 18         |
| Fe <sub>3</sub> O <sub>4</sub> @CNS                              | -41.2               | 3              | 7.99                                 | 19         |
| CMT@CNT/Co                                                       | -52.3               | 2              | 5.1                                  | 20         |
| Co@NCNs                                                          | -60.6               | 2.4            | 5.1                                  | 21         |
| Si <sub>3</sub> N <sub>4</sub>                                   | -26.7               | 3.75           | 4.2                                  | 22         |
| NiAl-LDH/G                                                       | -41.5               | 1.4            | 4.4                                  | 23         |
| Gd(OH) <sub>3</sub> @PPy                                         | -51.4               | 2.2            | 4.8                                  | 24         |



## References

1. Q. Song, F. Ye, L. Kong, Q. Shen, L. Han, L. Feng, G. Yu, Y. Pan and H. Li, *Adv. Funct. Mater.*, 2020, **30**, 2000475.
2. X. Zeng, X. Cheng, R. Yu and G. D. Stucky, *Carbon*, 2020.
3. M. Zhou, W. Gu, G. Wang, J. Zheng, C. Pei, F. Fan and G. Ji, *J. Mater. Chem. A*, 2020, **8**, 24267-24283.
4. R. Tandon, K. Sharma and N. Tandon, *Asian J. Chem.*, 2020, **32**, 3043-3046.
5. B. Han, W. Chu, X. Han, P. Xu, D. Liu, L. Cui, Y. Wang, H. Zhao and Y. Du, *Carbon*, 2020, **168**, 404-414.
6. N. Yang, R. Shao, Z. Zhang, M. Dou, J. Niu and F. Wang, *Carbon*, 2021, **178**, 775-782.
7. Y. Qiu, Y. Lin, H. Yang, L. Wang, M. Wang and B. Wen, *Chem. Eng. J.*, 2020, **383**, 123207.
8. B. Wen, H. Yang, Y. Lin, L. Ma, Y. Qiu and F. Hu, *J. Colloid Interface Sci.*, 2021, **586**, 208-218.
9. X. Li, L. Wang, W. You, L. Xing, X. Yu, Y. Li and R. Che, *Nanoscale*, 2019, **11**, 2694-2702.
10. J. Liang, J. Chen, H. Shen, K. Hu, B. Zhao and J. Kong, *Chem. Mater.*, 2021, **33**, 1789-1798.
11. X. Li, L. Yu, W. Zhao, Y. Shi, L. Yu, Y. Dong, Y. Zhu, Y. Fu, X. Liu and F. Fu, *Chem. Eng. J.*, 2020, **379**, 122393.
12. Y. Ding, L. Zhang, Q. Liao, G. Zhang, S. Liu and Y. Zhang, *Nano Res.*, 2016, **9**, 2018-2025.
13. Z. Li, H. Lin, S. Ding, H. Ling, T. Wang, Z. Miao, M. Zhang, A. Meng and Q. Li, *Carbon*, 2020, **167**, 148-159.
14. J. Wen, X. Li, G. Chen, Z. Wang, X. Zhou and H. Wu, *J. Colloid Interface Sci.*, 2021, **594**, 424-434.
15. P. Liu, Y. Huang, J. Yan, Y. Yang and Y. Zhao, *ACS Appl. Mater. Interfaces*, 2016, **8**, 5536-5546.
16. Y. Lü, Y. Wang, H. Li, Y. Lin, Z. Jiang, Z. Xie, Q. Kuang and L. Zheng, *ACS Appl. Mater. Interfaces*, 2015, **7**, 13604-13611.
17. Q. Hu, R. Yang, Z. Mo, D. Lu, L. Yang, Z. He, H. Zhu, Z. Tang and X. Gui, *Carbon*, 2019, **153**, 737-744.
18. Y. Liu, Z. Chen, W. Xie, S. Song, Y. Zhang and L. Dong, *ACS Sustain. Chem. Eng.*, 2019, **7**, 5318-5328.
19. Z. Liu, F. He, C. Shi, N. Zhao, E. Liu and C. He, *Chem. Phys. Lett.*, 2019, **716**, 221-226.
20. Z. Wu, K. Pei, L. Xing, X. Yu, W. You and R. Che, *Adv. Funct. Mater.*, 2019, **29**, 1901448.
21. P. Liu, S. Gao, G. Zhang, Y. Huang, W. You and R. Che, *Adv. Funct. Mater.*, 2021, 2102812.
22. F. Ye, Q. Song, Z. Zhang, W. Li, S. Zhang, X. Yin, Y. Zhou, H. Tao, Y. Liu and L. Cheng, *Adv. Funct. Mater.*, 2018, **28**, 1707205.
23. X. Xu, S. Shi, Y. Tang, G. Wang, M. Zhou, G. Zhao, X. Zhou, S. Lin and F. Meng, *Adv. Sci.*, 2021, **8**, 2002658.
24. W. Wei, X. Liu, W. Lu, H. Zhang, J. He, H. Wang and Y. Hou, *ACS Appl. Mater. Interfaces*, 2019, **11**, 12752-12760.
